# Supplementary material for: Fractionation and preconcentration of silver nanoparticles at environmentally relevant concentrations through induced eco-corona formation and spICP-MS characterization
Source: Royal Society of Chemistry journal article supplement (doi:10.1039/d3en00933e), 2024-01-01
Supplement: d3en00933e2.pdf [file d3en00933e2.pdf]

## Supporting Information

### Fractionation and preconcentration of silver nanoparticles at environmentally relevant concentrations through induced eco-corona formation and spICP-MS characterization

**Aline Martins de Andrade<sup>a</sup>, Anerise de Barros<sup>c</sup>, Italo Odone Mazali<sup>c</sup>, Marco Aurélio Zezzi Arruda<sup>a,b\*</sup>**

<sup>a</sup> Spectrometry, Sample Preparation and Mechanization Group - GEPAM, Institute of Chemistry, University of Campinas – Unicamp, P.O. Box 6154, Campinas, SP, Brazil, 13083-970

<sup>b</sup> National Institute of Science and Technology for Bioanalytics, Institute of Chemistry, University of Campinas – Unicamp, P.O. Box 6154, Campinas, SP, Brazil, 13083-970

<sup>c</sup> Laboratory of Functional Materials – LMF, Institute of Chemistry, University of Campinas – Unicamp, P.O. Box 6154, Campinas, SP, Brazil, 13083-970

Corresponding author: \*zezzi@unicamp.br

Table S1. Operational parameters for spICP-MS analysis.

| <b>Operational parameters</b> |                                |
|-------------------------------|--------------------------------|
| <b>ICP-MS</b>                 |                                |
| Spray chamber                 | Cyclonic                       |
| Nebulizer                     | MicroMist™                     |
| RF Power                      | 1550 W                         |
| Cool flow                     | 14 (L min <sup>-1</sup> )      |
| Auxiliary flow                | 0.8 (L min <sup>-1</sup> )     |
| Nebulizer flow                | 1 (L min <sup>-1</sup> )       |
| Cones                         | Sampler e skimmer - Ni         |
| Peristaltic pump              | 35 rpm                         |
| Sample flow rate              | 0.372 (mL min <sup>-1</sup> )* |
| <b>spICP-MS</b>               |                                |
| Analyte                       | Silver                         |
| Isotope (m/z)                 | <sup>107</sup> Ag <sup>+</sup> |
| Density                       | 10.49 g cm <sup>-3</sup>       |
| Dwell Time                    | 10 ms                          |
| Total Acquisition Time        | 180 s                          |

\*Calculated daily, measuring the water taken up by a peristaltic pump within 1 min (N = 3).

Table S2. Physicochemical analysis for river water.

| River water analysis                       | Results | Uncertainty (%) |
|--------------------------------------------|---------|-----------------|
| Total alkalinity (mg L <sup>-1</sup> )     | 99.0    | 3.6             |
| Total organic carbon (mg L <sup>-1</sup> ) | 6.5     | -               |
| Conductivity (μs cm <sup>-1</sup> )        | 255     | 20              |
| True color (TCU)                           | 12      | 12              |
| pH                                         | 7.3     | 1.8             |
| Turbidity (NTU)                            | 15.9    | 3.4             |
| Oxygen consumption (mg L <sup>-1</sup> )   | 5.8     | -               |

Table S3. Results for ANOVA of the proposed DoE.

|                             | ANOVA   |    |        |       |      |
|-----------------------------|---------|----|--------|-------|------|
|                             | SS      | df | MS     | F     | p    |
| 1 – HA (L+Q)                | 1670449 | 2  | 835225 | 32.40 | 0.03 |
| 2 – Shaking time (L)        | 289180  | 1  | 289180 | 11.22 | 0.08 |
| 3 – Centrifugation time (L) | 11476   | 1  | 11476  | 0.4   | 0.6  |
| 1 × 2                       | 182106  | 1  | 182106 | 7.1   | 0.1  |
| 1 × 3                       | 55611   | 1  | 55611  | 2.2   | 0.3  |
| 2 × 3                       | 68635   | 1  | 68635  | 2.7   | 0.2  |
| Lack of fit                 | 66066   | 1  | 66066  | 2.6   | 0.3  |
| Pure Error                  | 51553   | 2  | 25776  |       |      |
| Total SS                    | 2395077 | 10 |        |       |      |

Table S4. Number of detected NPs for each condition evaluated in the DoE experiments.

| HA concentration (mg L <sup>-1</sup> ) | Shaking time (min) | Centrifugation time (min) | Number of detected NPs |
|----------------------------------------|--------------------|---------------------------|------------------------|
| 1                                      | 120                | 10                        | 356                    |
| 20                                     | 120                | 10                        | 1732                   |
| 1                                      | 360                | 10                        | 1405                   |
| 20                                     | 360                | 10                        | 1814                   |
| 1                                      | 120                | 40                        | 814                    |
| 20                                     | 120                | 40                        | 1493                   |
| 1                                      | 360                | 40                        | 1129                   |
| 20                                     | 360                | 40                        | 1568                   |
| 10.5                                   | 240                | 25                        | 1640                   |
| 10.5                                   | 240                | 25                        | 1947                   |
| 10.5                                   | 240                | 25                        | 1875                   |

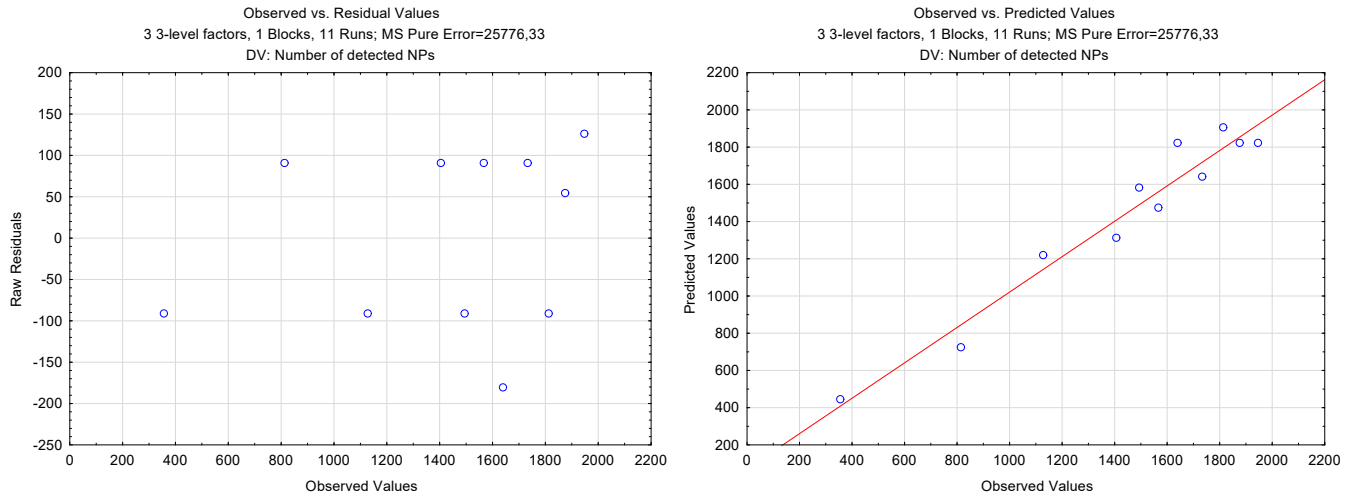

Figure S1. Observed vs. Residual values (left) and Observed vs. Predicted values (right) of ANOVA results.

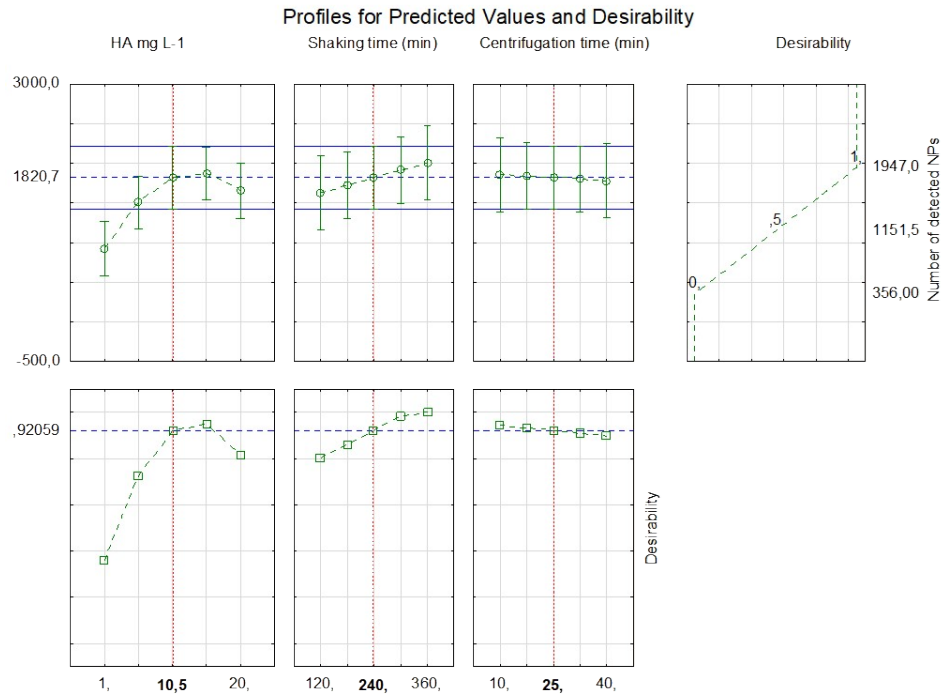

Figure S2. Profile for predicted values and desirability using the ANOVA results. It is possible to notice that the central point is indicated as the suitable condition for the method.

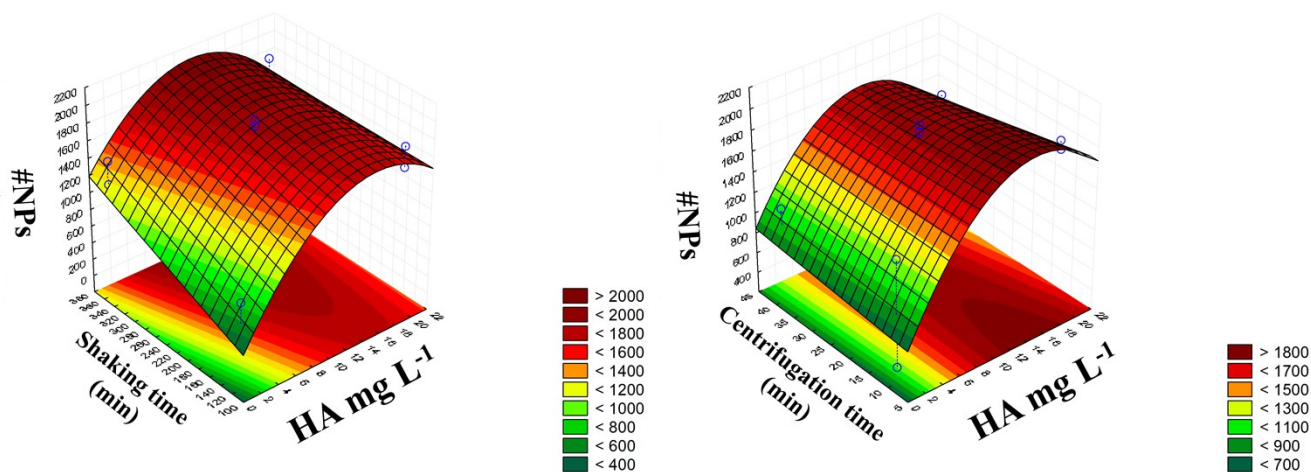

Figure S3. Response surface for ANOVA results obtained with a factorial experiment design ( $2^3$ ), with humic acid concentration, shaking time, and centrifugation time as factors.

The SEM-FEG using the mode S-TEM is performed by an auxiliary accessory, as illustrated in Figure S4. Figure S4(a) correspond to the sample preparation scheme, and Figure S4(b) correspond to the equipment SEM-FEG250 photo. Figure S4(c) illustrates the holder sample accessory used in the S-TEM and the chamber of microscopy, where the sample is inserted. Figure S4(d) shows a schematic illustration containing the main scanning electron microscopy components. Briefly, an aliquot of 10  $\mu\text{L}$  sample is dropped onto a carbon-copper grid using a micropipette and repeated one more time; then, the sample is dry to room temperature (Figure S4(a)). Then, the grid with AgNPs-HA deposited is allocated to the sample holder, as indicated in Figure S4(c). Subsequently, the chamber is closed, and a pump is pressed to make a vacuum until  $8 \times 10^{-3}$  Pa. The micrographs are then collected. Figure 4(d) corresponds to the schematic illustration of the main components of scanning electron microscopy, in which an electron gun is responsible for ejecting electrons from the tungsten filament and then the electron beam is driven to the sample by the anode and magnetic lens. After the interaction of electrons and the sample, the backscattered electrons are driven to the detector. The micrographs obtained using high-energy backscattered electrons provide different information, i.e. in addition to contrast based on relief, it is possible to obtain contrast based on the atomic number of the chemical elements present in the analysed sample, where the lighter regions of the image represent heavier chemical elements.

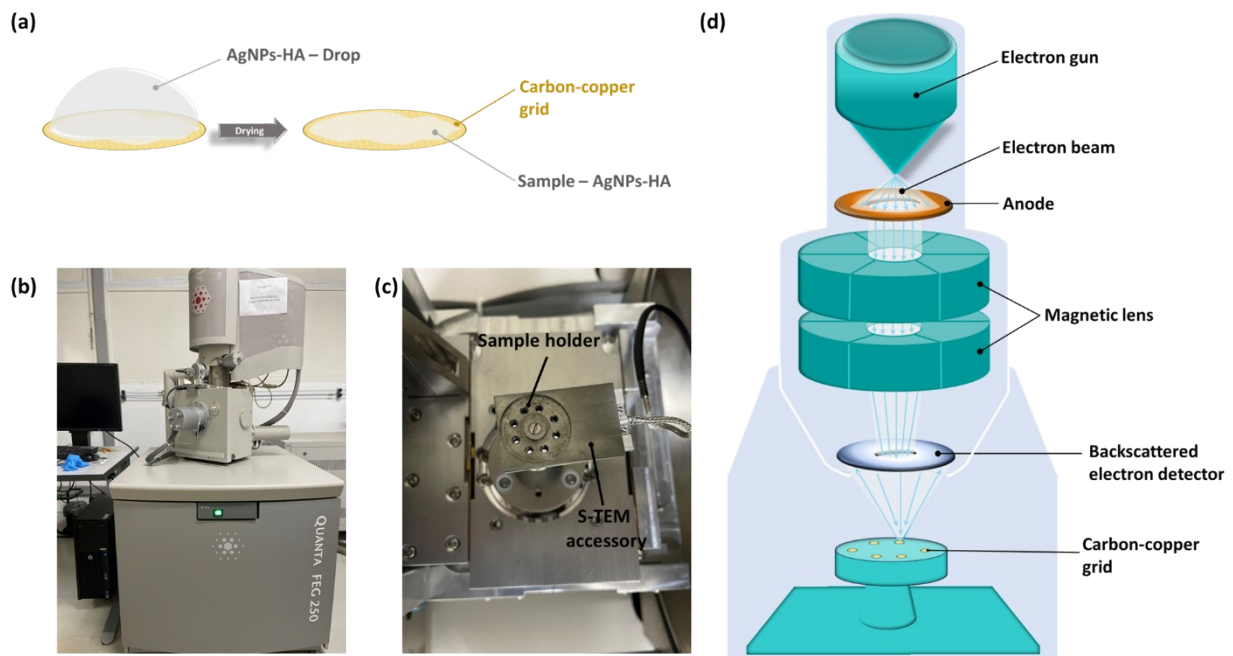

Figure S4. (a) Scheme of AgNPs-HA deposition onto carbon-copper grid; (b) Scanning electron microscopy equipment (SEM); (c) S-TEM auxiliary accessory used as sample holder; (d) schematic representation of SEM components.

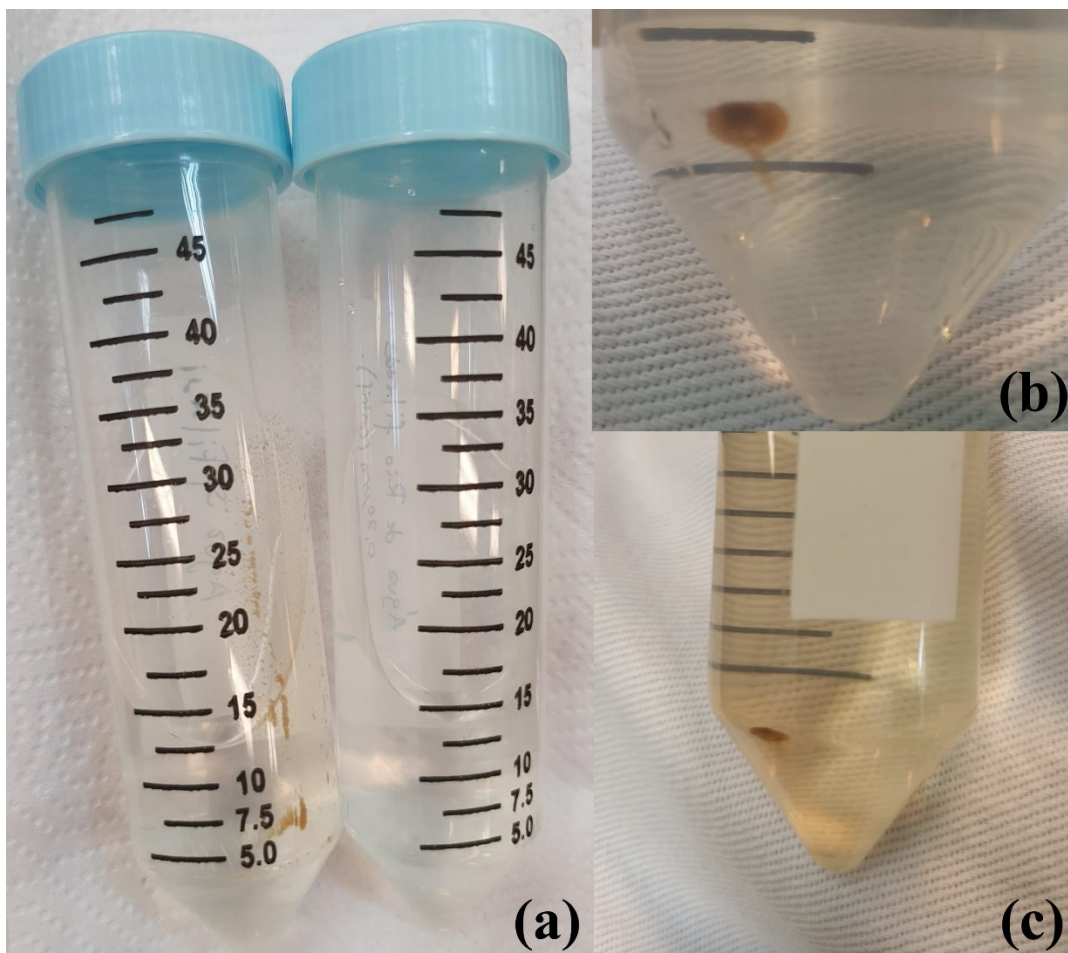

Figure S5. Centrifugation test with river water without AgNPs addition, on left unfiltered, and on right filtered with 0.20  $\mu\text{m}$  (a), river water filtered (0.20  $\mu\text{m}$ ) + HA (10.5  $\text{mg L}^{-1}$ ) (b); and river water filtered (0.20  $\mu\text{m}$ ) + AgNPs (8  $\text{ng L}^{-1}$ ) + HA (10.5  $\text{mg L}^{-1}$ ) (c). Conditions: 25 min at 14,000 g (accel and brake equal to 1).

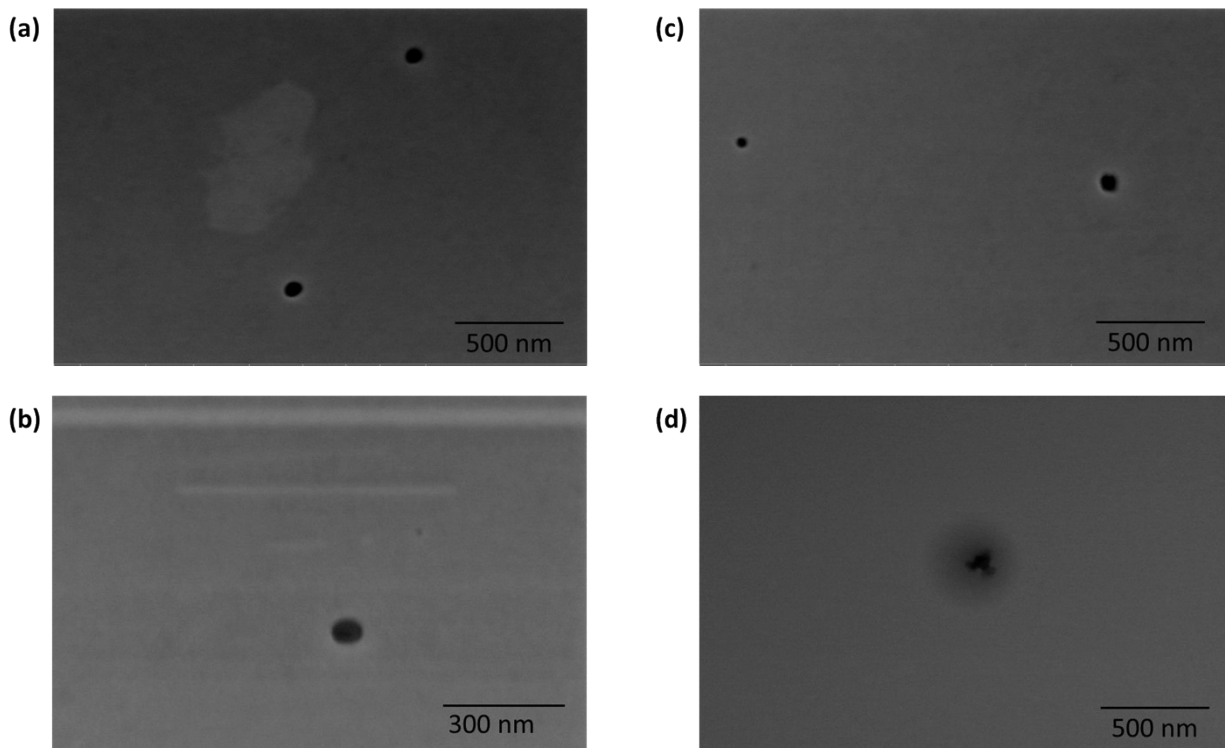

Figure S6. (a-d) S-TEM micrographs of humic acid incorporated on AgNPs in ultrapure water.
