# Supplementary material for: Fractionation and preconcentration of silver nanoparticles at environmentally relevant concentrations through induced eco-corona formation and spICP-MS characterization
Source: Royal Society of Chemistry journal article supplement (doi:10.1039/d3en00933e), 2024-01-01

Observed vs. Residual Values

3 3-level factors, 1 Blocks, 11 Runs; MS Pure Error=25776,33

DV: Number of detected NPs

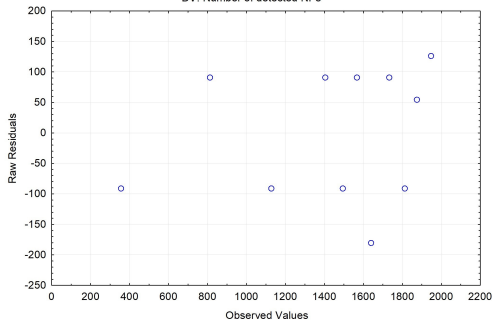

Observed vs. Predicted Values

3 3-level factors, 1 Blocks, 11 Runs; MS Pure Error=25776,33

DV: Number of detected NPs

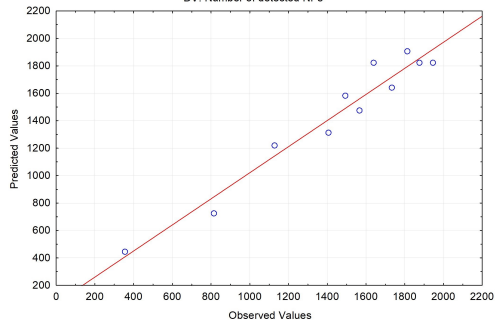

Supplement: d3en00933e3.pdf [file d3en00933e3.pdf]
