# Supplementary figures and images for: Fractionation and preconcentration of silver nanoparticles at environmentally relevant concentrations through induced eco-corona formation and spICP-MS characterization
Source: Royal Society of Chemistry journal article supplement (doi:10.1039/d3en00933e), 2024-01-01

Profiles for Predicted Values and Desirability

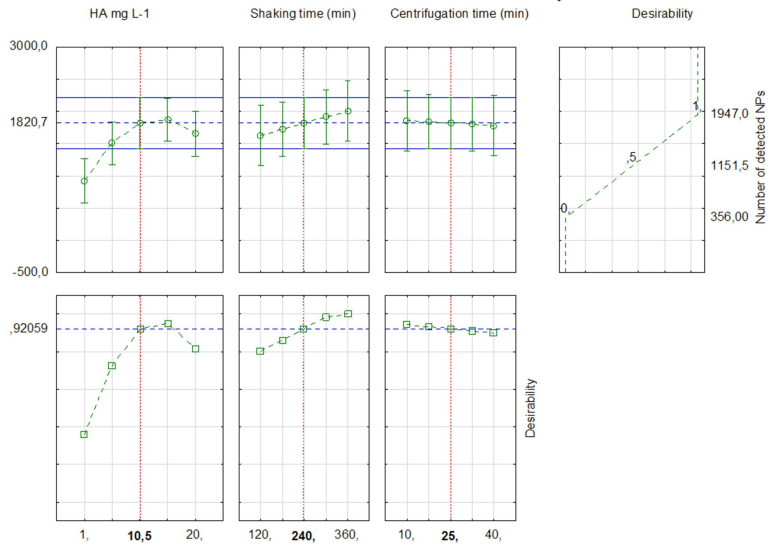

Supplement: d3en00933e4.pdf [file d3en00933e4.pdf]

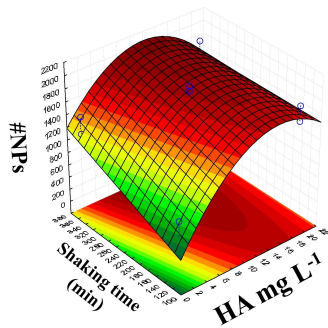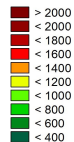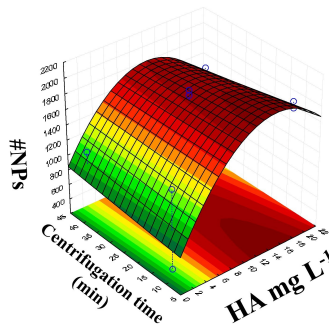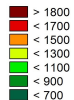

Supplement: d3en00933e5.pdf [file d3en00933e5.pdf]

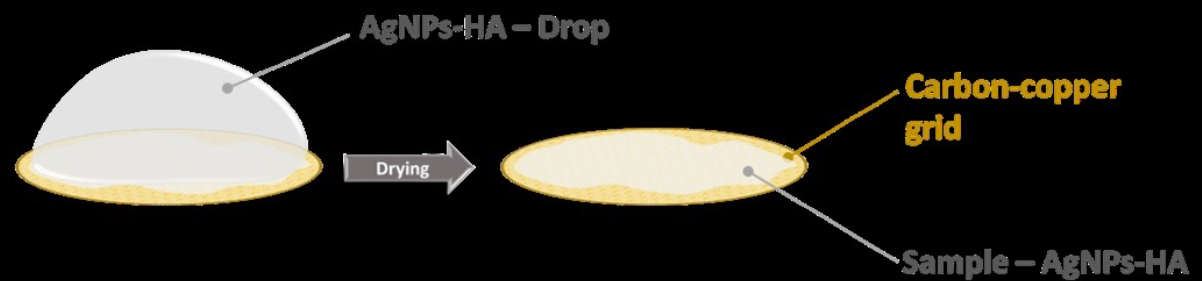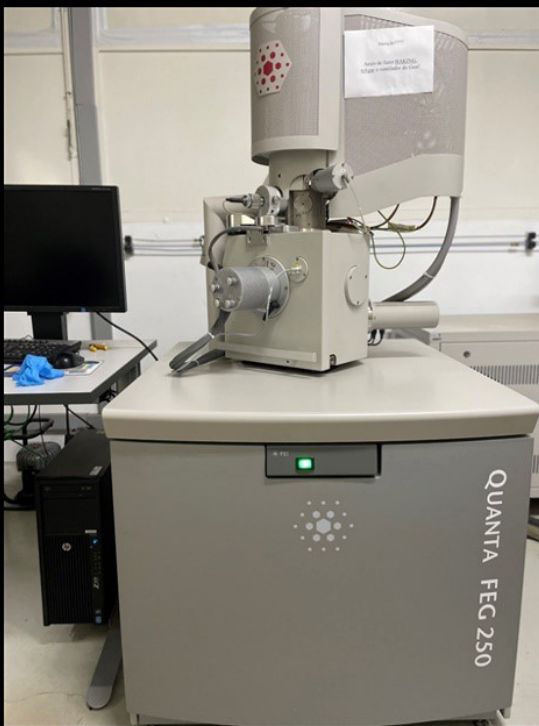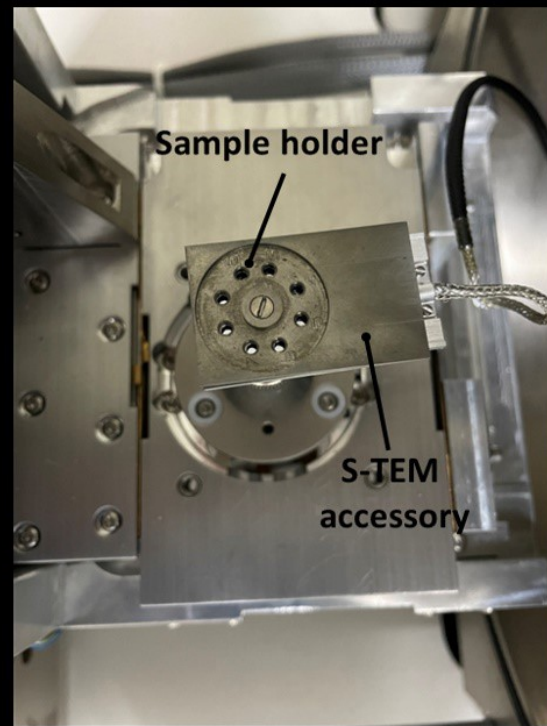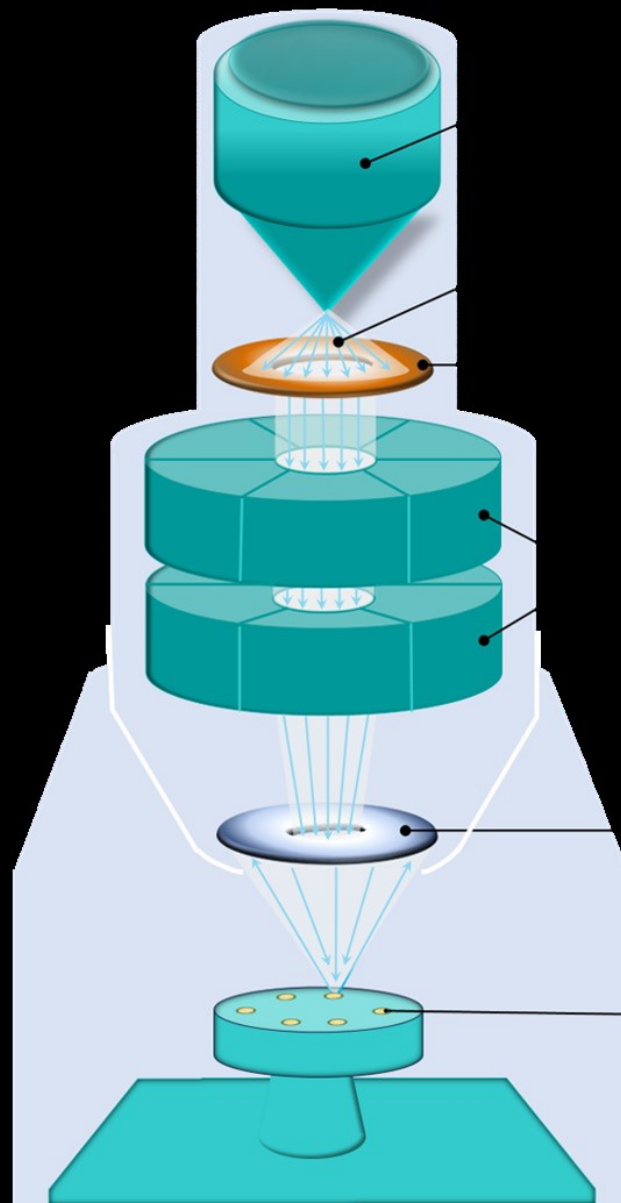

Supplement: d3en00933e6.pdf [file d3en00933e6.pdf]

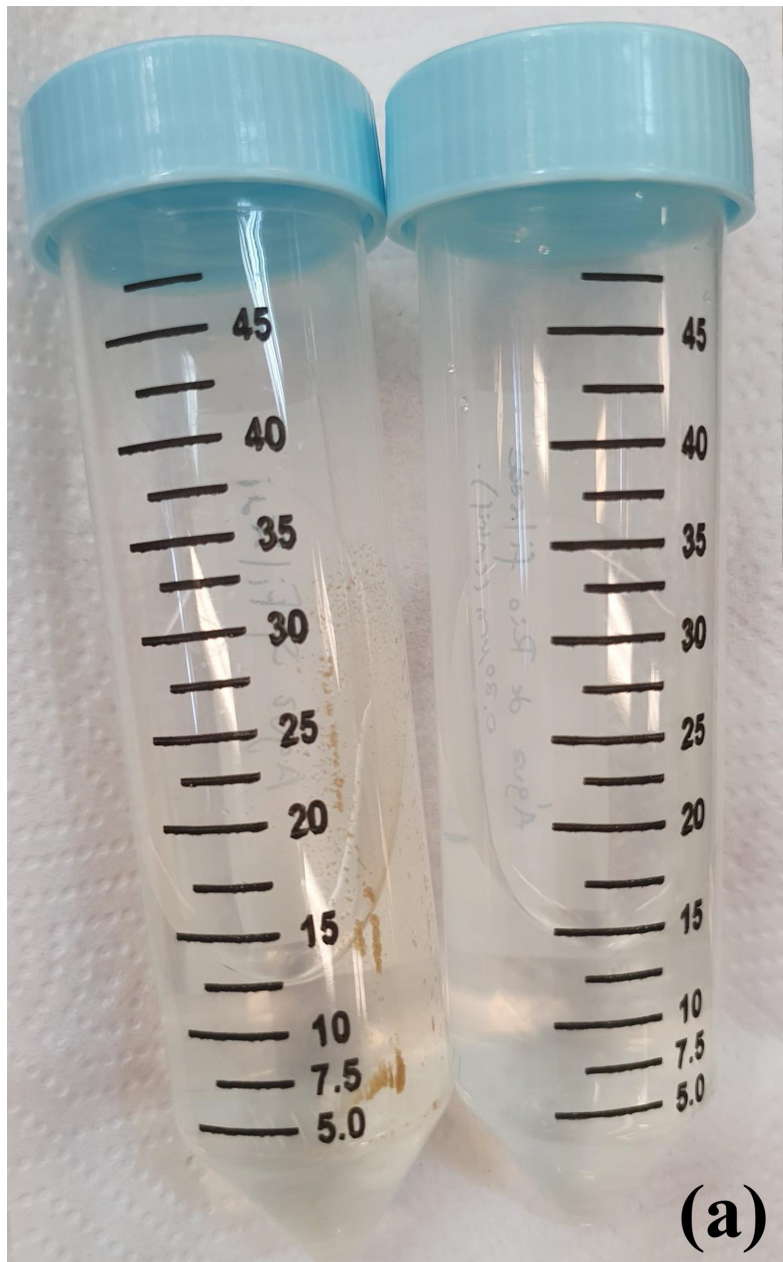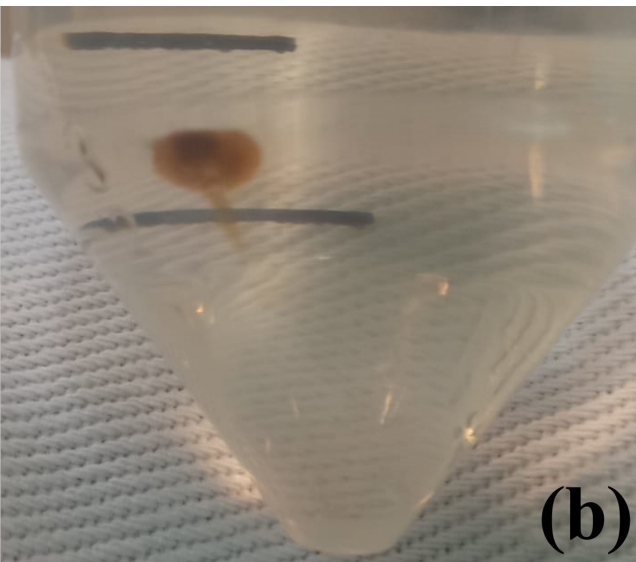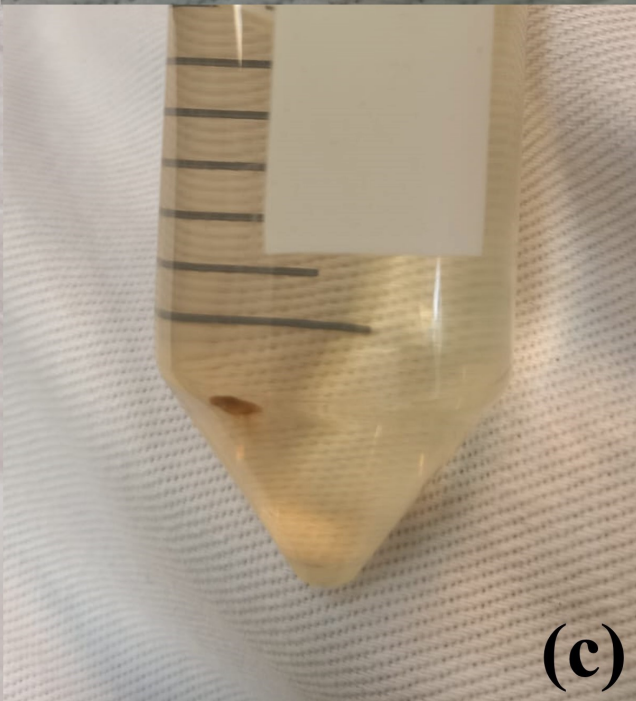

Supplement: d3en00933e7.pdf [file d3en00933e7.pdf]

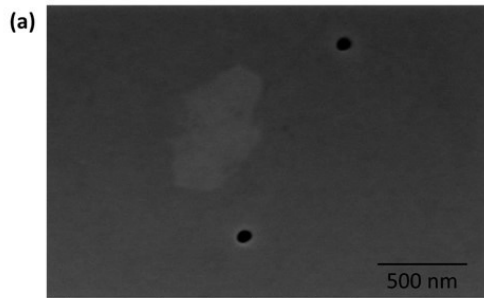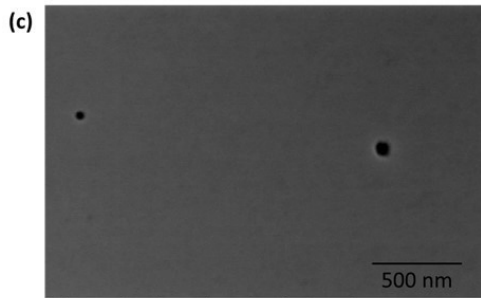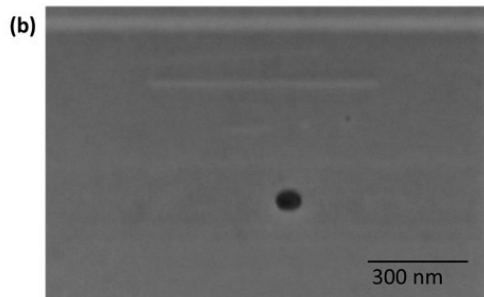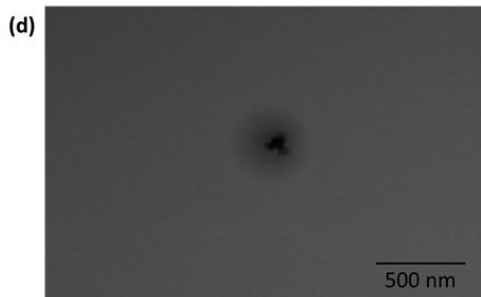

Supplement: d3en00933e8.pdf [file d3en00933e8.pdf]
